# Supplementary material for: Achieving narrowband emissions with tunable colors for multiple resonance-thermally activated delayed fluorescence materials: effect of boron/nitrogen number and position
Source: Royal Society of Chemistry journal article supplement (doi:10.1039/d3cp03781a), 2023-01-01
Supplement: d3cp03781a1.pdf [file d3cp03781a1.pdf]

## Supporting Information

### **Achieving narrowband emissions with tunable colors for multiple resonance-thermally activated delayed fluorescence materials: Effect of Boron/Nitrogen number and position**

Ping Li,<sup>a</sup> Yewen Zhang,<sup>a</sup> Wenjing Li,<sup>a</sup> Cefeng Zhou,<sup>a</sup> and Runfeng Chen<sup>a b\*</sup>

<sup>a</sup> State Key Laboratory of Organic Electronics and Information Displays & Institute of Advanced Materials (IAM), Nanjing University of Posts & Telecommunications, 9 Wenyuan Road, Nanjing 210023, P. R. China.

<sup>b</sup> School of Materials Science and Engineering, Zhejiang Sci-Tech University, Hangzhou 310018, P. R. China

\*Corresponding author.

*E-mail:* [iamrfchen@njupt.edu.cn](mailto:iamrfchen@njupt.edu.cn)

## Contents

Fig. S1 Optimized ground-state structures of the investigated molecules from top and side views.

Fig. S2 Optimized structures at  $S_1$  state of the investigated molecules.

Fig. S3 Diagram of geometry deviations between  $S_0$  and  $S_1$  states for molecular skeleton, peripheral methyl groups and heavy atoms together with the calculated RMSD values.

Fig. S4 Calculated Huang-Rhys (HR) factors versus the normal mode frequencies for the investigated molecules.

Fig. S5 Frontier molecular orbital density distributions, energy levels and HOMO-LUMO gaps of the studied molecules at the optimized  $S_1$  geometry.

Fig. S6 Hole and electron distributions for the investigated molecules.

Fig. S7 Details of the color-filled TDM maps for BN1.

Table S1 Simulated the maximum absorption wavelength ( $\lambda_{\text{abs}}$ , nm) of the experimental molecules with different DFT functionals.

Table S2 Simulated the maximum emission wavelengths ( $\lambda_{\text{emi}}$ , nm) of the experimental molecules with different DFT functionals.

Table S3 Calculated the maximum absorption and emission energies and wavelengths with B3LYP functional and different basis sets for the investigated experimental molecules.

Table S4 Calculated bond lengths of the studied molecules at  $S_0$  and  $S_1$  states.

Table S5 Calculated the low-lying energies ( $E_{S1}$ ), the maximum absorption wavelengths ( $\lambda_{\text{abs}}$ ), oscillator strengths ( $f$ ), and transition compositions related to  $S_0 \rightarrow S_1$  process for the investigated molecules in toluene.

Table S6 Calculated oscillator strength and the square of the transition dipole moment for the investigated molecules relevant to absorption and emission processes.

Table S7 Simulated FWHM at the maximum emission wavelength of the studied molecules.

## Computational Methodology

### Huang-Rhys (HR) Factor

$$S = \sum S_i = \sum \frac{1}{2} \Delta Q_i^2$$

$\Delta Q_i$  refers to the dimensionless displacement of the equilibrium position of the ground state and excited state under the  $i^{\text{th}}$  vibration mode, and  $S_i$  refers to the Huang-Rhys factor of the  $i^{\text{th}}$  vibration mode.

### Reorganization Energy

$$\lambda = \sum \lambda_i = \sum \hbar \omega_i S_i$$

$$\lambda_i = \frac{k_i}{2} \Delta Q_i^2, \quad S_i = \frac{\lambda_i}{\hbar \omega_i}$$

Here,  $k_i$  and  $\omega_i$  are the corresponding force constants and vibrational frequencies, which can be calculated and analyzed from the normal-mode analysis method using the DUSHIN code.

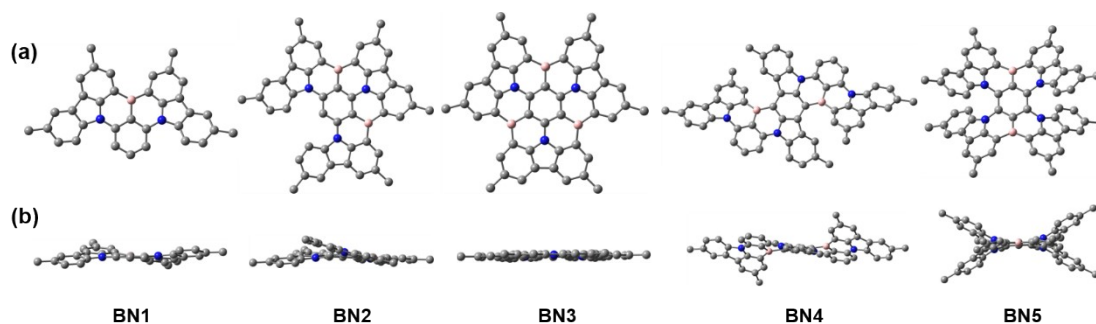

Fig. S1 Optimized ground-state structures of the investigated molecules from top (a) and side (b) views.

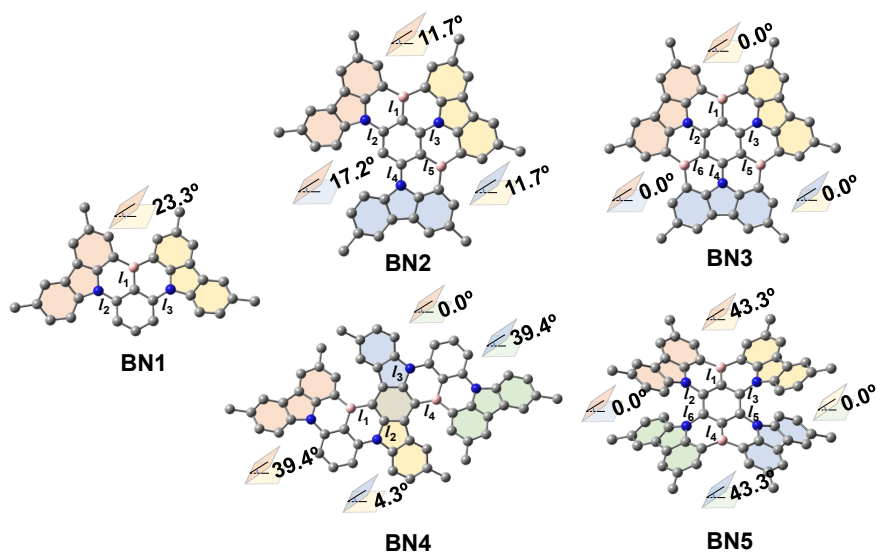

Fig. S2 Optimized structures at  $S_1$  state of the investigated molecules together with the calculated dihedral angles.

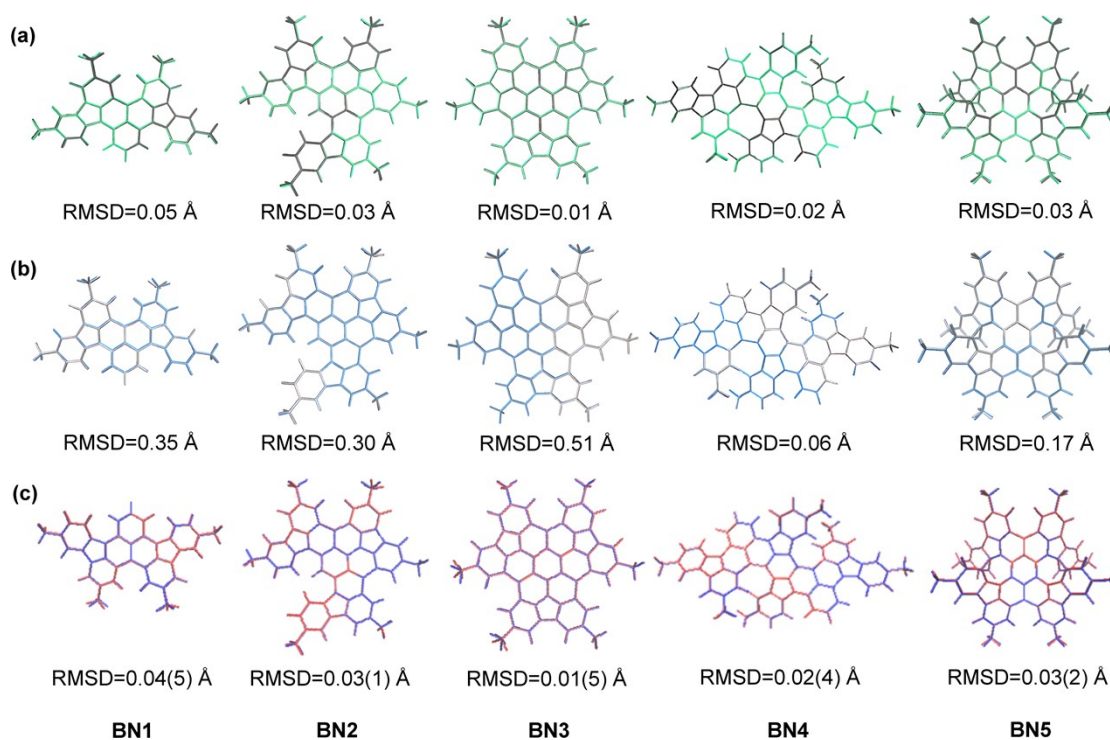

Fig. S3 Diagram of geometry deviations between  $S_0$  and  $S_1$  states for (a) molecular skeleton (the structures at  $S_0$  and  $S_1$  states are depicted in green and red, respectively), (b) peripheral methyl groups (the structures at  $S_0$  and  $S_1$  states are depicted in grey and blue, respectively), and (c) heavy atoms (the structures at  $S_0$  and  $S_1$  states are depicted

in deep-blue and red, respectively) together with the calculated RMSD values.

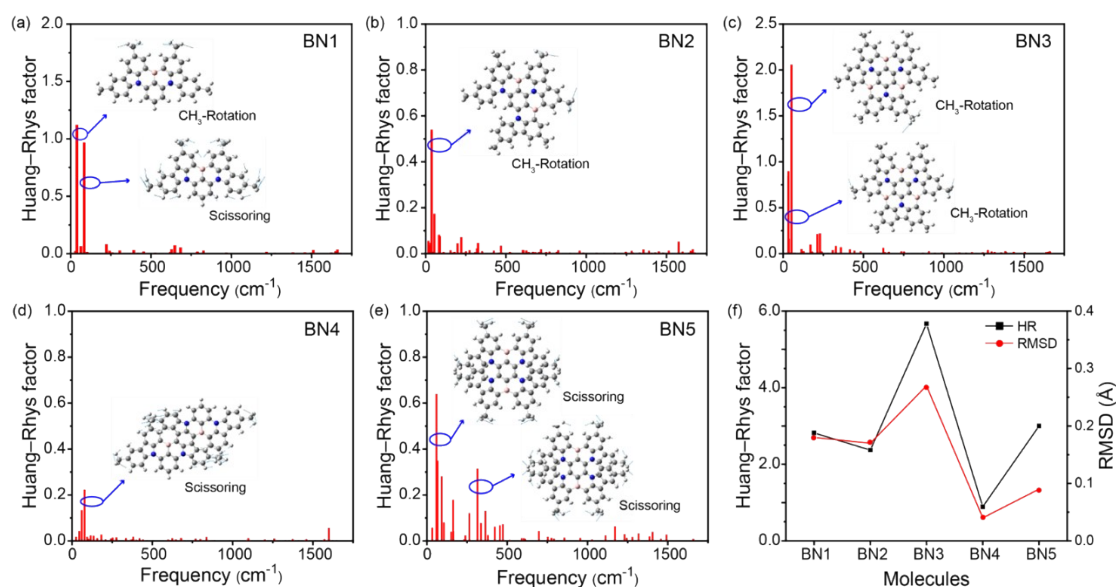

Fig. S4 Calculated Huang-Rhys (HR) factors versus the normal mode frequencies for the investigated molecules of (a) BN1, (b) BN2, (c) BN3, (d) BN4, and (e) BN5 (Vibration modes with large contributions to the HR factors are shown as insets). (f) Changing trend of HR factors and RMSD values.

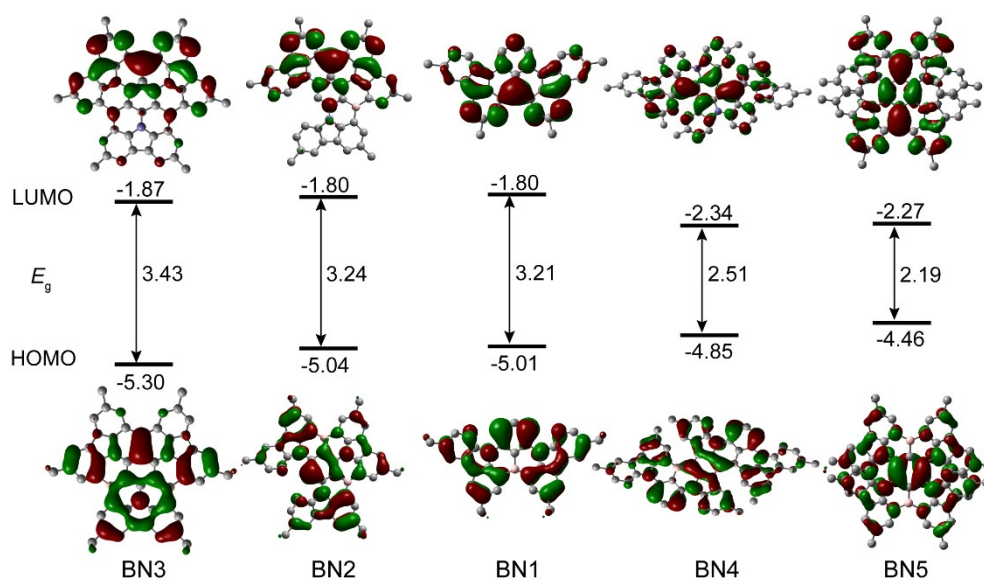

Fig. S5 Frontier molecular orbital density distributions, energy levels and HOMO-LUMO gaps of the studied molecules at the optimized  $S_1$  geometry.

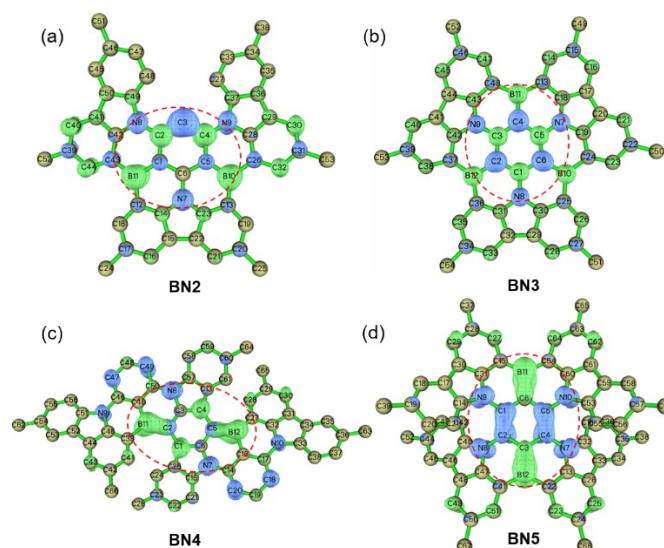

Fig. S6 Hole and electron distributions for the investigated molecules of (a) BN2, (b) BN3, (c) BN4, and (d) BN5.

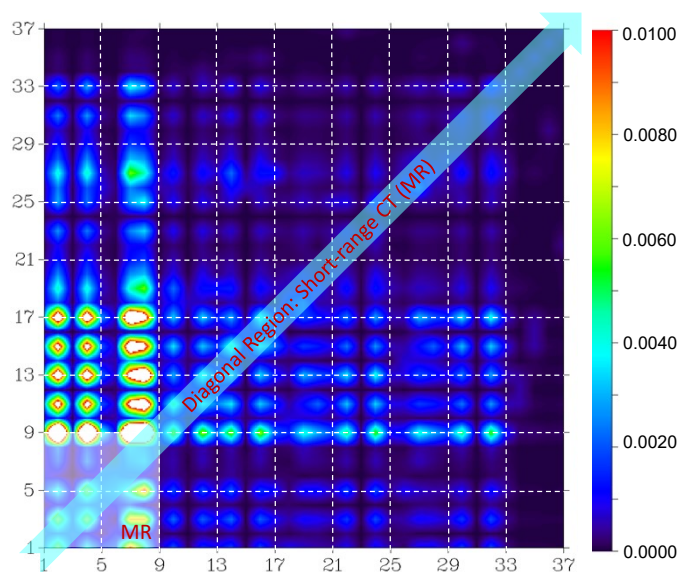

Fig. S7 Details of the color-filled TDM maps for BN1.

Table S1 Simulated the maximum absorption wavelengths ( $\lambda_{\text{abs}}$ , nm) of the experimental molecules with different DFT functionals.

| Compd. | $\lambda_{\text{abs}}$ (nm) |
|--------|-----------------------------|
|--------|-----------------------------|

|     | MPW1KCI                    | B3LYP                    | PBE0                     | CAM-  | $\omega$ B97XD            | Exp.                               |
|-----|----------------------------|--------------------------|--------------------------|-------|---------------------------|------------------------------------|
|     | S (15% HF <sub>exc</sub> ) | (20% HF <sub>exc</sub> ) | (25% HF <sub>exc</sub> ) | B3LYP | (100% HF <sub>exc</sub> ) |                                    |
|     | a                          |                          |                          |       |                           |                                    |
| BN1 | 464                        | 443                      | 429                      | 378   | 371                       | 468                                |
| BN2 | 455                        | 435                      | 421                      | 373   | 367                       | 453                                |
| BN4 | 617                        | 582                      | 560                      | 470   | 458                       | 597                                |
| BN5 | 674                        | 634                      | 613                      | 516   | 504                       | 629 <sup>b</sup> /651 <sup>c</sup> |

<sup>a</sup> (19% HF<sub>exc</sub> at short-range and 65% HF<sub>exc</sub> at long-range)

<sup>b</sup> BN5 without alkyl unit; <sup>c</sup> BN5 with tert-butyl alkyl units

Table S2 Simulated the maximum emission wavelengths ( $\lambda_{\text{emi}}$ , nm) of the experimental molecules with different DFT functionals.

| Compd. | $\lambda_{\text{emi}}$ (nm) |                          |                          |       |                           | Exp.                               |
|--------|-----------------------------|--------------------------|--------------------------|-------|---------------------------|------------------------------------|
|        | MPW1KCIS                    | B3LYP                    | PBE0                     | CAM-  | $\omega$ B97XD            |                                    |
|        | (15% HF <sub>exc</sub> )    | (20% HF <sub>exc</sub> ) | (25% HF <sub>exc</sub> ) | B3LYP | (100% HF <sub>exc</sub> ) |                                    |
|        | a                           |                          |                          |       |                           |                                    |
| BN1    | 488                         | 465                      | 448                      | 390   | 382                       | 489                                |
| BN2    | 479                         | 453                      | 435                      | 379   | 372                       | 466                                |
| BN4    | 645                         | 607                      | 583                      | 487   | 473                       | 615                                |
| BN5    | 758                         | 713                      | 690                      | 581   | 568                       | 662 <sup>b</sup> /692 <sup>c</sup> |

<sup>a</sup> (19% HF<sub>exc</sub> at short-range and 65% HF<sub>exc</sub> at long-range)

<sup>b</sup> BN5 without alkyl unit; <sup>c</sup> BN5 with tert-butyl alkyl units

Table S3 Calculated the maximum absorption and emission energies and wavelengths

with B3LYP functional and different basis sets for the investigated experimental molecules.

| Compd. | $\lambda_{\text{abs}}$ (eV/nm) |          | Exp. (nm)                          | $\lambda_{\text{emi}}$ (eV/nm) |          | Exp. (nm)                          |
|--------|--------------------------------|----------|------------------------------------|--------------------------------|----------|------------------------------------|
|        | 6-31G(d)                       | def-TZVP |                                    | 6-31G(d)                       | def-TZVP |                                    |
| BN1    | 2.80/443                       | 2.75/451 | 468                                | 2.67/465                       | 2.62/474 | 489                                |
| BN2    | 2.85/435                       | 2.81/441 | 453                                | 2.74/453                       | 2.68/462 | 466                                |
| BN4    | 2.13/582                       | 2.10/591 | 597                                | 2.04/607                       | 2.01/617 | 615                                |
| BN5    | 1.95/634                       | 1.91/649 | 629 <sup>b</sup> /651 <sup>c</sup> | 1.74/713                       | 1.70/730 | 662 <sup>a</sup> /692 <sup>b</sup> |

<sup>a</sup> BN5 without alkyl unit; <sup>b</sup> BN5 with tert-butyl alkyl units

Table S4 Calculated bond lengths (indicated in Fig. 2 and Fig. S1) of the studied molecules at  $S_0$  and  $S_1$  states.

| Compd. | $S_0$ |       |       |       |       |       | $S_1$ |       |       |       |       |       |
|--------|-------|-------|-------|-------|-------|-------|-------|-------|-------|-------|-------|-------|
|        | $l_1$ | $l_2$ | $l_3$ | $l_4$ | $l_5$ | $l_6$ | $l_1$ | $l_2$ | $l_3$ | $l_4$ | $l_5$ | $l_6$ |
| BN1    | 1.54  | 1.40  | 1.40  |       |       |       | 1.55  | 1.40  | 1.40  |       |       |       |
| BN2    | 1.54  | 1.40  | 1.38  | 1.40  | 1.54  |       | 1.56  | 1.39  | 1.37  | 1.40  | 1.54  |       |
| BN3    | 1.54  | 1.36  | 1.36  | 1.36  | 1.54  | 1.54  | 1.58  | 1.37  | 1.37  | 1.37  | 1.55  | 1.55  |
| BN4    | 1.55  | 1.39  | 1.40  | 1.55  |       |       | 1.53  | 1.40  | 1.40  | 1.53  |       |       |
| BN5    | 1.56  | 1.41  | 1.41  | 1.56  | 1.41  | 1.41  | 1.54  | 1.40  | 1.40  | 1.54  | 1.40  | 1.40  |

Table S5 Calculated the low-lying energies ( $E_{S1}$ ), the maximum absorption wavelengths ( $\lambda_{\text{abs}}$ ), oscillator strengths ( $f$ ), and transition compositions related to  $S_0 \rightarrow S_1$  process for the investigated molecules in toluene.

| Compd. | $E_{S1}$ (eV) | $\lambda_{\text{abs}}$ (nm) | $f$    | Transition configuration |
|--------|---------------|-----------------------------|--------|--------------------------|
| BN1    | 2.80          | 443                         | 0.5116 | H $\rightarrow$ L (0.99) |

|     |      |     |        |                              |
|-----|------|-----|--------|------------------------------|
| BN2 | 2.85 | 435 | 0.5060 | H→L (0.95)                   |
| BN3 | 3.07 | 403 | 0.0000 | H-1→L+1 (0.48); H→L+2 (0.48) |
| BN4 | 2.13 | 582 | 0.6441 | H→L (0.99)                   |
| BN5 | 1.95 | 634 | 0.3878 | H→L (0.99)                   |

Table S6 Calculated oscillator strength and the square of the transition dipole moment ( $\mu^2$ ) for the investigated molecules relevant to absorption and emission processes.

| Compd. | Abs.   |         | Emi.   |         |
|--------|--------|---------|--------|---------|
|        | $f$    | $\mu^2$ | $f$    | $\mu^2$ |
| BN1    | 0.5116 | 7.4593  | 0.4395 | 6.7215  |
| BN2    | 0.506  | 7.2525  | 0.2792 | 4.1677  |
| BN3    | 0      | 0       | 0.006  | 0.0833  |
| BN4    | 0.6441 | 12.3341 | 0.6028 | 12.04   |
| BN5    | 0.3878 | 8.097   | 0.3392 | 7.9704  |

Table S7 Simulated FWHM at the maximum emission wavelength of the studied molecules.

| Compd.                          | BN1     | BN2     | BN3    | BN4     | BN5     |
|---------------------------------|---------|---------|--------|---------|---------|
| $\lambda_{em}$ (nm)             | 465     | 453     | 422    | 607     | 713     |
| FWHM <sub>Cal.</sub><br>(nm/eV) | 26/0.15 | 20/0.12 | 8/0.03 | 22/0.07 | 31/0.08 |
| FWHM <sub>Exp.</sub>            | 23/0.13 | 16/0.09 | --     | 21/0.07 | 38/0.14 |
